# Supplementary material for: Responses of weed community, soil nutrients, and microbes to different weed management practices in a fallow field in Northern China
Source: PeerJ. 2019 Sep 6;7:e7650. doi: 10.7717/peerj.7650 (PMC6733240; doi:10.7717/peerj.7650)
Supplement: Supplemental Information 1 [file peerj-07-7650-s001.xlsx]

## Sheet: Sheet1
	Calystegia hederacea rhizome under N treatment					Calystegia hederacea rhizome under D treatment
	Buds length(cm)	Buds diameter（mm)				Buds length(cm)	Buds diameter（mm)
N-1	24.71	2.67			D-1	17.97	4.04
	24.41	1.58				7.77	1.76
	31.52	2.01				8.78	1.86
	30.04	1.45				10.01	2.13
	26.18	1.42				2.01	2.52
	10.18	1.81				0	4.63
	24.78	1.79				2.79	1.87
	17.23	1.6				0	2.23
	27	1.63				6.48	3.42
	20.07	2.18				0	3.48
N-2	22.12	1.52			D-2	23.05	2.79
	23.4	1.82				7.15	4.11
	30.97	1.41				26.28	2.43
	13.63	1.99				18.84	3.24
	23.35	1.65				17.44	2.64
	13.68	1.51				14.05	3.31
	10.19	1.75				30.36	3.51
	16.3	1.47				12.02	2.86
	12.36	1.83				12.99	2.57
	13.05	1.68				15.45	2.09
N-3	6.04	1.52			D-3	17.79	1.79
	21.79	1.88				8.31	1.52
	25.09	2				0	1.86
	22.47	1.45				17.8	2.9
	19.71	1.56				6.33	3.03
	32.37	1.52				16.5	2
	30.91	1.62				3.19	3.08
	34.08	1.5				20.78	2.31
	27.28	1.79				7.36	2.86
	20.62	1.68				14.31	2.4
N—4	27.49	1.66			D—4	4.61	2.52
	24.19	1.96				3.27	2.9
	19.77	1.77				5.65	1.4
	20.67	1.84				4.08	2.07
	16.62	1.77				5.98	1.36
	29.11	1.45				7.9	1.65
	28.95	1.87				0	2.1
	10.54	1.79				3.01	1.84
	18.21	1.6				2.61	2.13
	37.31	2.06				0	2.01
N-5	16.56	1.61			D-5	4.09	2.85
	15.76	1.61				10.05	2.33
	16.34	1.05				7.03	1.98
	32.86	1.64				10.85	2.37
	19.88	1.7				14.14	2.34
	32.18	1.63				11.22	1.93
	12.87	1.08				3.99	2.76
	19.2	1.78				7.52	2.82
	25.15	1.01				7.34	2.68
	16.64	1.27				4.12	2.75
N-6	20.69	1.2			D-6	5.57	3.12
	23.31	2.31				6.58	2.77
	25.05	1.82				10.88	3.14
	7.24	1.2				6.56	3.64
	20.58	1.32				4.32	4.08
	12.55	1.48				3.03	2.69
	8.57	1.85				7.25	2.01
	15.27	1				21.19	1.88
	11.92	1.46				9.98	1.72
	10.32	1.52				6.91	2.17
D, deep tillage with moldboard plow; N, nature fallow
