# Supplementary material for: Responses of weed community, soil nutrients, and microbes to different weed management practices in a fallow field in Northern China
Source: PeerJ. 2019 Sep 6;7:e7650. doi: 10.7717/peerj.7650 (PMC6733240; doi:10.7717/peerj.7650)
Supplement: Supplemental Information 2 [file peerj-07-7650-s002.xlsx]

## Sheet: Sheet1
	Total PLFAs	actinomycetes	total bacteria	total fungi	Arbuscular mycorrhiza	common bacteria	gram-negative	gram-positive	fungi
N-1	9.0339	1.23877	6.76587	1.02926	0.416112	2.44141	2.02985	2.29461	0.613151
N-2	6.70159	1.10389	4.99689	0.600805	0.377962	1.90223	1.36338	1.73128	0.222843
N-3	6.00124	1.09219	4.40104	0.508012	0.35183	1.57254	1.22176	1.60673	0.156183
C-1	5.27959	0.782633	4.02973	0.467222	0.286054	1.57235	0.974279	1.48311	0.181168
C-2	5.31149	0.873928	3.88432	0.553244	0.305854	1.41457	1.04453	1.42522	0.24739
C-3	4.08286	0.661583	3.02882	0.392458	0.216131	1.12986	0.778924	1.12004	0.176327
D-1	5.62611	0.327267	4.73014	0.568705	0.315356	1.54607	1.65983	1.52423	0.253348
D-2	6.43725	0.429581	5.03949	0.968182	0.251447	2.22232	1.52659	1.29058	0.716735
D-3	5.16407	0.742823	3.77165	0.649596	0.284502	1.45615	1.10549	1.21001	0.365094
H-1	3.13142	0.533656	2.32203	0.275725	0.155869	0.849604	0.614687	0.857743	0.119857
H-2	4.53642	0.776493	3.37078	0.389154	0.232522	1.25726	0.840088	1.27343	0.156632
H-3	3.86567	0.7436	2.74987	0.372196	0.213182	1.0647	0.809841	0.875324	0.159014
Unit:nmol g-1
N, natural fallow; C, physical clear; D, deep tillage; H, spraying herbicides
