# Supplementary material for: Responses of weed community, soil nutrients, and microbes to different weed management practices in a fallow field in Northern China
Source: PeerJ. 2019 Sep 6;7:e7650. doi: 10.7717/peerj.7650 (PMC6733240; doi:10.7717/peerj.7650)
Supplement: Supplemental Information 3 [file peerj-07-7650-s003.xlsx]

## Sheet: Sheet2
Unit:nmol g-1
N, natural fallow; C, physical clear; D, deep tillage; H, spraying herbicides
The gray PLFAs were recognized with PCA
Peak Name	14:0	15:0	16:0	17:0	18:0	20:0	22:0	24:0	14:0 iso	14:0 iso 3OH	15:0 anteiso	15:0 DMA	15:0 iso	15:1 anteiso w9c	15:1 iso w6c	15:1 w6c	16:0 10-methyl	16:0 2OH	16:0 anteiso	16:0 DMA	16:0 iso	16:0 N alcohol	16:1 w3c	16:1 w5c	16:1 w7c	16:1 w9c	16:2 DMA	17:0 10-methyl	17:0 anteiso	17:0 cyclo w7c	17:0 iso	17:1 w7c 10-methyl	17:1 w8c	18:0 10-methyl	18:0 DMA	18:0 iso	18:1 w3c	18:1 w7c	18:1 w7c 10-methyl	18:1 w9c	18:2 w6c	18:3 w6c	19:0 anteiso	19:0 cyclo w7c	19:1 w8c	19:3 w6c	20:1 w8c	20:1 w9c	20:4 w6c
N	0.15326	0.0968038	1.79953	0.0963078	0.295513	0.0577245	0.0322736	0.0201803	0.116881	0.0495743	0.987309	0.127877	1.02854	0.0339757	0.113869	0.0236055	0.796994	0.0182622	0.0489692	2.03858	0.529048	2.05882		0.416112	1.08995	0.132216	0.0129895	0.102243	0.366727	0.549995	0.253412	0.112311	0.120376	0.339533			0.229235	1.0677	0.0834729	0.806327	0.445861	0.16729		0.349556	0.0443125	0.0552466	0.0239718	0.0463335	0.101099
N	0.141717	0.0865431	1.32808	0.0744965	0.271393	0.0567838	0.0360138	0.0293298	0.0802791	0.0576544	0.466254	0.0984365	0.860198	0.0286622	0.098052	0.0270474	0.686114		0.0434457	1.87559	0.365845			0.377962	0.691876	0.114169	0.013579	0.0790483	0.21817	0.280028	0.206785	0.103323	0.0821274	0.338726				0.641578	0.0723279	0.580587	0.198473	0.0243703		0.280954	0.0408829	0.0521402	0.0269004	0.0374496
N	0.0913534	0.0680336	1.12269	0.0652026	0.225267	0.03891	0.0185246	0.0143027	0.0629838	0.0394648	0.436596	0.0988043	0.788276	0.0197604	0.084803		0.719227		0.0396356	1.74934	0.353706	1.82072		0.35183	0.685671	0.106603		0.0849942	0.204276	0.279416	0.197486	0.100631	0.0766738	0.287967		0.0825159		0.603415	0.0601798	0.511747	0.156183			0.273965	0.0440505	0.0412743	0.0287031
C	0.0975597	0.069622	1.11198	0.0620602	0.231123	0.0443624	0.0215423	0.0157373	0.0652939	0.0457018	0.404389	0.0921177	0.739556	0.0222963	0.0495683		0.581514		0.0307415	2.17164	0.343444	1.85264		0.286054	0.501346	0.091893	0.0709048	0.201118	0.235273	0.196596	0.0995403	0.0732078	0.264061			0.0371575		0.410117	0.045991	0.472269	0.151035	0.0301332		0.223234	0.0440958	0.0514144	0.0255336	0.0333349
C	0.0905329	0.0633119	0.999632	0.0590195	0.202071	0.036423	0.0182097		0.0600822	0.0381537	0.362434	0.0844529	0.667378	0.0186775	0.0635144		0.598379		0.0345591	1.69888	0.31688			0.305854	0.52353	0.0862646	0.0106361	0.076892	0.188149	0.247206	0.192728	0.0872728	0.0788306	0.198656	0.0420604			0.486293	0.0541577	0.471975	0.20689	0.0405002	0.050305	0.268341	0.0408167	0.0482085	0.0200012	0.0327235
C	0.066858	0.050377	0.789306	0.0531962	0.170121	0.0287445	0.0162984	0.0109241	0.0446556	0.0379667	0.287884	0.067013	0.505429	0.0226133	0.04167		0.442898		0.0273156	1.59391	0.260672	1.67879		0.216131	0.373928	0.0638683		0.0605831	0.154817	0.186946	0.154461	0.0622223	0.0732482	0.158101	0.03379			0.340993	0.0368391	0.374063	0.12348	0.052847	0.175867		0.0326637	0.0393035	0.0271117	0.0437002	0.0166543
D	0.0972668	0.068928	1.08364	0.0691039	0.227134	0.0431091	0.0232792	0.0154092	0.0634349	0.0421303	0.373721	0.0866283	0.705245	0.0232271	0.053828	0.599866			0.0340148	1.69804	0.339305			0.315356	0.494187	0.0939704	0.0119495	0.0730851	0.205804	0.243935	0.210444	0.0832734	0.0875262	0.254182				0.450468	0.0528215	0.515527	0.17851	0.0748388		0.244127	0.0389688	0.0452491	0.0194476	0.0356127
D	0.106654	0.0715389	1.72188	0.0723745	0.249868	0.107001	0.0518079	0.0164184	0.0684381	0.0517994	0.340191	0.0797302	0.575796	0.0243588	0.0478459	0.455643			0.0329257	1.66446	0.318138		0.0417742	0.251447	0.536576	0.068287	0.0311731	0.073695	0.179102	0.225199	0.149106	0.0622895	0.0809017	0.355886				0.501374	0.131264	0.501286	0.645563	0.0711723		0.247885	0.0340976	0.0471219	0.0159
D	0.0811767	0.0631227	1.0505	0.0623353	0.19901	0.0460462	0.0227383	0.0133242	0.0528735	0.0382542	0.306976	0.0660432	0.549749	0.0206227	0.0493935		0.466256		0.030986	1.52167	0.279074			0.284502	0.486622	0.0695785		0.0604926	0.165476	0.226821	0.162841	0.062154	0.0774796	0.216074				0.485776	0.0539321	0.550139	0.298002	0.0670919		0.204181	0.0346644	0.0410219		0.0314812
H	0.0440021	0.0359552	0.603826	0.0355188	0.130302	0.0221469			0.0356032	0.0215385	0.238159	0.0515304	0.398848		0.0403605		0.353019		0.0257265	0.981368	0.19907			0.155869	0.306911	0.0522711	0.0159837	0.0363533	0.119496	0.153809	0.104725	0.0571757	0.0443372	0.144284				0.271243	0.0246146	0.291173	0.0921546	0.0277022	0.0346782	0.141528	0.0240627			0.0196223
H	0.0711857	0.0517857	0.899946	0.0527177	0.18162	0.0340146	0.0189792	0.0149768	0.0576213	0.0305409	0.320045	0.0705821	0.608033	0.0226951	0.0470713		0.508336		0.0279233	1.21338	0.285905			0.232522	0.40313	0.0734909		0.0613908	0.165365	0.194433	0.156509	0.074586	0.0626973	0.206766		0.0521889		0.352238	0.0381377	0.414359	0.156632			0.199663	0.0316379	0.0405113	0.0169887	0.0273879
H	0.0575044	0.0404444	0.77032	0.0464628	0.149973	0.0273391	0.0151329	0.0121194	0.0364916	0.0213698	0.251297	0.0568908	0.447703		0.0453664		0.43114		0.0309699	1.15009	0.217243	1.5311		0.213182	0.3891	0.0686169	0.0448047	0.136947	0.173886	0.128497		0.0702105	0.0474433	0.175513		0.0493901		0.376638	0.0304826	0.364586	0.159014		0.0328147	0.164123	0.0309431	0.0349689	0.0174993	0.0250739
[truncated: 5 more columns]
