# Supplementary material for: Responses of weed community, soil nutrients, and microbes to different weed management practices in a fallow field in Northern China
Source: PeerJ. 2019 Sep 6;7:e7650. doi: 10.7717/peerj.7650 (PMC6733240; doi:10.7717/peerj.7650)
Supplement: Supplemental Information 4 [file peerj-07-7650-s004.xlsx]

## Sheet: Density
		1	2	3	4	5	6	7	8	9	10	11	12	13	14	15	16	17	18	19	20	21	22	23	24	25	26	27
data	Species	Chenopodium album	Chenopodium serotinum	Humulus scandens	Eleusine indica	Belamcanda chinensis	Digitaria sanguinalis	Calystegia hederacea	Potentilla supina	Sonchus arvensis	Polygonum aviculare	Ixeris polycephala	Lilium concolor	Setaria viridis	Raphanus sativus	Lagopsis supina	Acalypha australis	Portulaca oleracea	Cyperus nipponicus	Cynodon dactylon	Amaranthus retroflexus	Cephalanoplos setosum	Cirsium setosum	Euphorbia humifusa	Capsella bursapastoris	Abutilon theophrasti	Descurainia sophia	Hemistepta lyrata	Total
2016.7.8	N	0	109.778	2.22222	0	1.77778	4	15.1111	18.2222	0.444444	7.11111	0	4.44444	0	0	0	0	0	0	0	0	0	0	0	0	0	0	0	163.111
2016.8.24	N	0.444444	0	5.33333	0.888889	3.55556	0	15.5556	0.444444	0	0	0	0	0.444444	21.7778	10.6667	0.444444	0.444444	0	0	0	0	0	0	0	0	0	0	60
2016.10.28	N	0	0	7.55556	0	0	0	0	0	0	0	0	0	0	0	0	0	0	0	0	0	0	0	0	0	0	0	0	7.55556
2017.4.15	N	0	0	60.4444	0	2.66667	0	68	0	0	0	0	2.66667	0	0	8.44444	0	0	0	0	0	0	0	0	4.88889	0	0.444444	0	147.556
	Total	0.444444	109.778	75.5556	0.888889	8	4	98.6667	18.6667	0.444444	7.11111	0	7.11111	0.444444	21.7778	19.1111	0.444444	0.444444	0	0	0	0	0	0	4.88889	0	0.444444	0	378.222
2016.7.8	C	1.33333	106.667	5.33333	0	3.11111	4	25.7778	13.7778	3.11111	1.77778	0	0	0	0	0	0	0	0	0	0	0	0	0	0	0	0	0	164.889
2016.8.24	C	5.77778	0	0	20.8889	0	0.444444	119.111	22.2222	13.7778	0	0	0	0	20.8889	214.222	3.11111	12	8	1.33333	0	0	0	0	0	0	0	0	441.778
2016.10.28	C	0	40.8889	0	0.888889	0	0	10.2222	7.11111	0	0	7.11111	0	0	0	456	0	0	0.444444	0	0	0	0.888889	0	24.8889	0	0	0	548.444
2017.4.15	C	0	0	0	0	0	0	180.444	8.88889	0	0.444444	15.1111	2.66667	0	0	81.3333	0	0	0	0	0	0	4.88889	0	53.7778	0	6.22222	0	353.778
	Total	7.11111	147.556	5.33333	21.7778	3.11111	4.44444	335.556	52	16.8889	2.22222	22.2222	2.66667	0	20.8889	751.556	3.11111	12	8.44444	1.33333	0	0	5.77778	0	78.6667	0	6.22222	0	1508.89
2016.7.8	D	1.33333	79.5556	2.22222	0	4.44444	7.11111	49.3333	25.7778	0	0.444444	0	2.22222	0	0	0	0	0	0	0	0	0	0	0	0	0	0	0	172.444
2016.8.24	D	0	0	0	3.11111	0.888889	0	173.778	0	0	0	0	0	0	0	0	2.22222	9.77778	0	0	0.888889	0.444444	4.44444	0.444444	0	0	0	0	196
2016.10.28	D	0	19.5556	0	3.11111	0	0	114.667	39.1111	0	0	0	0	1.33333	0	102.667	0.888889	35.1111	0	0	1.77778	0	8.88889	0	58.6667	0.444444	0	0	386.222
2017.4.15	D	0	4.88889	12	0	0	0	213.778	0	0	2.22222	3.55556	6.22222	0	0	6.66667	0	0	0	0	0	0.444444	17.7778	0	4.88889	0	0	0	272.444
	Total	1.33333	104	14.2222	6.22222	5.33333	7.11111	551.556	64.8889	0	2.66667	3.55556	8.44444	1.33333	0	109.333	3.11111	44.8889	0	0	2.66667	0.888889	31.1111	0	0	0	0	0	962.667
2016.7.8	H	1.77778	188.444	0.888889	5.33333	8	11.1111	16.4444	18.6667	14.2222	0	8	0	0	0	0	0	0	0	0	0	0	0	0	0	0	0	0	272.889
2016.8.24	H	1.77778	0	0	14.2222	2.66667	1.77778	21.7778	0	7.11111	0	2.66667	0	7.55556	26.6667	88.4444	0	0	4.44444	4	0	0	0	0	0	0	0	0	183.111
2016.10.28	H	0	0	0	0	0	0	0	5.33333	0	0	0	0	0	0	52	0	0	0	0	0	0	0.444444	0	0	0	0	0	57.7778
2017.4.15	H	0	0	17.7778	0	1.33333	0	131.111	0	0	0	0	0	0	0	7.11111	0	0	0	0	0	0	0	0	4.88889	0	5.77778	1.33333	169.333
	Total	3.55556	188.444	18.6667	19.5556	12	12.8889	169.333	24	21.3333	0	10.6667	0	7.55556	26.6667	147.556	0	0	4.44444	4	0	0	0.444444	0	4.88889	0	5.77778	1.33333	683.111
	unit:plants/m²

## Sheet: Biomass
		1	2	3	4	5	6	7	8	9	10	11	12	13	14	15	16	17	18	19	20	21	22	23	24	25	26	27
Date	Species	Chenopodium album	Chenopodium serotinum	Humulus scandens	Eleusine indica	Belamcanda chinensis	Digitaria sanguinalis	Calystegia hederacea	Potentilla supina	Sonchus arvensis	Polygonum aviculare	Ixeris polycephala	Lilium concolor	Setaria viridis	Raphanus sativus	Lagopsis supina	Acalypha australis	Portulaca oleracea	Cyperus nipponicus	Cynodon dactylon	Amaranthus retroflexus	Cephalanoplos setosum	Cirsium setosum	Euphorbia humifusa	Capsella bursapastoris	Abutilon theophrasti	Descurainia sophia	Hemistepta lyrata	Total
2016.7.8	N	0	109.982	69.9644	0	14.7778	1.08	4.08	89.8	0.257778	7.71111	0	0.888889	0	0	0	0	0	0	0	0	0	0	0	0	0	0	0	298.542
2016.8.24	N	0.64	0	106.884	10.04	13.5022	0	0.715556	0.844444	0	0	0	0	0.133333	0.577778	0.0711111	4.51111	1.62222	0	0	0	0	0	0	0	0	0	0	139.542
2016.10.28	N	0	0	197.511	0	0	0	0	0	0	0	0	0	0	0	0	0	0	0	0	0	0	0	0	0	0	0	0	197.511
2017.4.15	N	0	0	14.7111	0	1.24444	0	15.7378	0	0	0	0	1.56	0	0	3.94222	0	0	0	0	0	0	0	0	2.66667	0	1.55111	0	41.4133
	Total	0.64	109.982	389.071	10.04	29.5244	1.08	20.5333	90.6444	0.257778	7.71111	0	2.44889	0.133333	0.577778	4.01333	4.51111	1.62222	0	0	0	0	0	0	2.66667	0	1.55111	0	677.009
2016.7.8	C	0.373333	92.9467	84.2933	0	0	0.457778	7.37778	31.2267	1.42667	2.50222	0	0	0	0	0	0	0	0	0	0	0	0	0	0	0	0	0	220.604
2016.8.24	C	10.72	0	0	25.5289	0	0.551111	35.7111	1.35111	1.43556	0	0	0	0	0.324444	35.3644	1.05333	9.01778	1.14222	0.493333	0	0	0	0	0	0	0	0	122.693
2016.10.28	C	0	25.1111	0	1.30222	0	0	2.01778	2.46222	0	0	4.33333	0	0	0	166.027	0	0	0.32	0	0	0	0.382222	0	8.39111	0	0	0	210.347
2017.4.15	C	0	0	0	0	0	0	14.8444	3.42667	2.66667	0	0	1.02667	0	0	52.3911	0	0	0	0	0	0	1.01778	0	30.4711	0	10.4622	0	116.307
	Total	11.0933	118.058	84.2933	26.8311	0	1.00889	59.9511	38.4667	5.52889	2.50222	4.33333	1.02667	0	0.324444	253.782	1.05333	9.01778	1.46222	0.493333	0	0	1.4	0	38.8622	0	10.4622	0	669.951
2016.7.8	D	9.71111	85.7778	26.6756	0	17.5244	0.737778	16.3778	214.956	0	0.337778	0	0.577778	0	0	0	0	0	0	0	0	0	0	0	0	0	0	0	372.676
2016.8.24	D	0	0	0	0.146667	0.866667	0	76.8356	0	0	0	0	0	0	0	0	0.382222	1.09333	0	0	2.13778	1.00444	3.81778	0.0577778	0	0	0	0	86.3422
2016.10.28	D	0	3.71111	0	2.72	0	0	25.0844	4.20889	0	0	0	0	0.533333	0	19.1067	0.146667	13.2089	0	0	0.213333	0	5.41333	0	19.3422	0.0666667	0	0	93.7556
2017.4.15	D	0	1.54667	4.59111	0	0	0	21.1822	0	1.8	0	0	1.32889	0	0	4.52	0	0	0	0	0	0	5.95556	0	15.0267	0	0	0	55.9511
	Total	9.71111	91.0356	31.2667	2.86667	18.3911	0.737778	139.48	219.164	1.8	0.337778	0	1.90667	0.533333	0	23.6267	0.528889	14.3022	0	0	2.35111	1.00444	15.1867	0.0577778	34.3689	0.0666667	0	0	608.724
2016.7.8	H	6.55111	130.498	15.9067	1.04	41.9378	6.77778	14.7822	209.44	29.64	0	2.08	0	0	0	0	0	0	0	0	0	0	0	0	0	0	0	0	458.653
2016.8.24	H	48.1778	0	0	44.8711	5.16444	0.0844444	4.99111	0	10.4667	0	0.302222	0	28.6	0.04	3.12	0	0	1.07111	11.2489	0	0	0	0	0	0	0	0	158.138
2016.10.28	H	0	0	0	0	0	0	0	5.04444	0	0	0	0	0	0	16.8756	0	0	0	0	0	0	0.524444	0	0	0	0	0	22.4444
2017.4.15	H	0	0	4.54667	0	0.626667	0	11.5867	0	0	0	0	0	0	0	11.1244	0	0	0	0	0	0	0	0	2.98667	0	32.8578	0.346667	64.0756
	Total	54.7289	130.498	20.4533	45.9111	47.7289	6.86222	31.36	214.484	40.1067	0	2.38222	0	28.6	0.04	31.12	0	0	1.07111	11.2489	0	0	0.524444	0	2.98667	0	32.8578	0.346667	703.311
	unit:g/m²

## Sheet: Frequency
		1	2	3	4	5	6	7	8	9	10	11	12	13	14	15	16	17	18	19	20	21	22	23	24	25	26	27
Date	Species	Chenopodium album	Chenopodium serotinum	Humulus scandens	Eleusine indica	Belamcanda chinensis	Digitaria sanguinalis	Calystegia hederacea	Potentilla supina	Sonchus arvensis	Polygonum aviculare	Ixeris polycephala	Lilium concolor	Setaria viridis	Raphanus sativus	Lagopsis supina	Acalypha australis	Portulaca oleracea	Cyperus nipponicus	Cynodon dactylon	Amaranthus retroflexus	Cephalanoplos setosum	Cirsium setosum	Euphorbia humifusa	Capsella bursapastoris	Abutilon theophrasti	Descurainia sophia	Hemistepta lyrata
2016.7.8	N	0	1	0.444444	0	0.222222	0.333333	0.444444	0.777778	0.111111	0.666667	0	0.333333	0	0	0	0	0	0	0	0	0	0	0	0	0	0	0
2016.8.24	N	0.111111	0	0.444444	0.111111	0.222222	0	0.555556	0.111111	0	0	0	0	0.111111	0.555556	0.111111	0.111111	0.111111	0	0	0	0	0	0	0	0	0	0
2016.10.28	N	0	0	1	0	0	0	0	0	0	0	0	0	0	0	0	0	0	0	0	0	0	0	0	0	0	0	0
2017.4.15	N	0	0	0.888889	0	0.222222	0	0.888889	0	0	0	0	0.111111	0	0	0.333333	0	0	0	0	0	0	0	0	0.222222	0	1	0
	Total	0.111111	1	2.77778	0.111111	0.666667	0.333333	1.88889	0.888889	0.111111	0.666667	0	0.444444	0.111111	0.555556	0.444444	0.111111	0.111111	0	0	0	0	0	0	0.222222	0	1	0
2016.7.8	C	0.111111	0.888889	0.555556	0	0.111111	0.111111	0.444444	0.555556	0.333333	0.333333	0	0	0	0	0	0	0	0	0	0	0	0	0	0	0	0	0
2016.8.24	C	0.666667	0	0	0.666667	0.111111	0.111111	1	0.111111	0.444444	0	0	0	0	0.222222	0.111111	0.555556	0	0.333333	0.222222	0	0	0	0	0	0	0	0
2016.10.28	C	0	0.666667	0	0.222222	0	0	0.111111	0.222222	0	0	0.222222	0	0	0	1	0	0	0.111111	0	0	0	0.111111	0	0.222222	0	0	0
2017.4.15	C	0	0	0	0	0	0	1	0.333333	0.444444	1	0	1	0	0	0.888889	0	0	0	0	0	0	0.111111	0	0.888889	0	0.222222	0
	Total	0.777778	1.55556	0.555556	0.888889	0.222222	0.222222	2.55556	1.22222	1.22222	1.33333	0.222222	1	0	0.222222	2	0.555556	0	0.444444	0.222222	0	0	0.222222	0	1.11111	0	0.222222	0
2016.7.8	D	0.222222	0.666667	0.222222	0	0.333333	0.222222	0.222222	0.555556	0	0.111111	0	0.333333	0	0	0	0	0	0	0	0	0	0	0	0	0	0	0
2016.8.24	D	0	0	0	0	0.111111	0	0.888889	0	0	0	0	0	0	0	0	0.333333	0.555556	0	0.111111	0.222222	0.111111	0.222222	0.111111	0	0	0	0
2016.10.28	D	0	1	0	0.222222	0	0	1	0.222222	0	0	0	0	0.222222	0	0.333333	0.222222	0.444444	0	0	0.111111	0	0.333333	0	0.777778	0.111111	0	0
2017.4.15	D	0	0.222222	0.222222	0	0	0	0.888889	0	0.333333	0.222222	0	0.222222	0	0	0.222222	0	0	0	0	0	0.111111	0.333333	0	0.777778	0	0	0
	Total	0.222222	1.88889	0.444444	0.222222	0.444444	0.222222	3	0.777778	0.333333	0.333333	0	0.555556	0.222222	0	0.555556	0.555556	1	0	0.111111	0.333333	0.222222	0.888889	0.111111	1.55556	0.111111	0	0
2016.7.8	H	0.111111	0.888889	0.222222	0.333333	0.555556	0.222222	0.222222	0.333333	0.333333	0	0.111111	0	0	0	0	0	0	0	0	0	0	0	0	0	0	0	0
2016.8.24	H	0	0	0	0	0.222222	0.111111	0.444444	0	0.222222	0	0.111111	0	0.555556	0.333333	0.555556	0	0	0.222222	0.333333	0	0	0	0	0	0	0	0
2016.10.28	H	0	0	0	0	0	0	0	0.111111	0	0	0	0	0	0	0.222222	0	0	0	0	0	0	0.111111	0	0	0	0	0
2017.4.15	H	0	0	0.333333	0	0.111111	0	1	0	0	0	0	0	0	0	0.222222	0	0	0	0	0	0	0	0	0.222222	0	0.555556	0.111111
	Total	0.111111	0.888889	0.555556	0.333333	0.888889	0.333333	1.66667	0.444444	0.555556	0	0.222222	0	0.555556	0.333333	1	0	0	0.222222	0.333333	0	0	0.111111	0	0.222222	0	0.555556	0.111111

## Sheet: RIV(100%)
		1	2	3	4	5	6	7	8	9	10	11	12	13	14	15	16	17	18	19	20	21	22	23	24	25	26	27
	Species	Chenopodium album	Chenopodium serotinum	Humulus scandens	Eleusine indica	Belamcanda chinensis	Digitaria sanguinalis	Calystegia hederacea	Potentilla supina	Sonchus arvensis	Polygonum aviculare	Ixeris polycephala	Lilium concolor	Setaria viridis	Raphanus sativus	Lagopsis supina	Acalypha australis	Portulaca oleracea	Cyperus nipponicus	Cynodon dactylon	Amaranthus retroflexus	Cephalanoplos setosum	Cirsium setosum	Euphorbia humifusa	Capsella bursapastoris	Abutilon theophrasti	Descurainia sophia	Hemistepta lyrata
Relative frequency	N	0.961538	8.65385	24.0385	0.961538	5.76923	2.88462	16.3462	7.69231	0.961538	5.76923	0	3.84615	0.961538	4.80769	3.84615	0.961538	0.961538	0	0	0	0	0	0	1.92308	0	8.65385	0
	C	4.63576	9.27152	3.31126	5.29801	1.3245	1.3245	15.2318	7.28477	7.28477	7.94702	1.3245	5.96026	0	1.3245	11.9205	3.31126	0	2.64901	1.3245	0	0	1.3245	0	6.62252	0	1.3245	0
	D	1.5748	13.3858	3.14961	1.5748	3.14961	1.5748	21.2598	5.51181	2.3622	2.3622	0	3.93701	1.5748	0	3.93701	3.93701	7.08661	0	0.787402	2.3622	1.5748	6.29921	0.787402	11.0236	0.787402	0	0
	H	1.17647	9.41176	5.88235	3.52941	9.41176	3.52941	17.6471	4.70588	5.88235	0	2.35294	0	5.88235	3.52941	10.5882	0	0	2.35294	3.52941	0	0	1.17647	0	2.35294	0	5.88235	1.17647
Relative density	N	0.117509	29.0247	19.9765	0.235018	2.11516	1.05758	26.087	4.93537	0.117509	1.88014	0	1.88014	0.117509	5.75793	5.05288	0.117509	0.117509	0	0	0	0	0	0	1.2926	0	0.117509	0
	C	0.471281	9.77909	0.353461	1.4433	0.206186	0.294551	22.2386	3.44624	1.11929	0.147275	1.47275	0.17673	0	1.38439	49.8085	0.206186	0.795287	0.559647	0.0883652	0	0	0.382916	0	5.21355	0	0.412371	0
	D	0.129814	10.1255	1.38468	0.605798	0.519256	0.692341	53.6997	6.31761	0	0.259628	0.34617	0.822155	0.129814	0	10.6447	0.302899	4.3704	0	0	0.259628	0.0865426	3.02899	0.0432713	6.1878	0.0432713	0	0
	H	0.530973	31.9912	1.85841	2.38938	1.37168	1.85841	25	0.530973	2.12389	0	1.32743	0	0.840708	2.83186	24.115	0	0	0.530973	0.486726	0	0	0.0442478	0	0.973451	0	1.06195	0.132743
Relative biomass	N	0.000139634	16.2453	57.4691	1.48299	4.36101	0.159525	3.03295	13.389	0.038076	1.139	0	0.361722	0.0196945	0.0853427	0.592804	0.66633	0.239616	0	0	0	0	0	0	0.393889	0	0.229112	0
	C	1.65584	17.6218	12.582	4.00494	0	0.150591	8.94858	5.74171	0.825268	0.373493	0.646813	0.153245	0	0.0484281	37.8807	0.157225	1.34604	0.218258	0.0736372	0	0	0.20897	0	5.80075	0	1.56164	0
	D	1.59532	14.9551	5.13642	0.47093	3.02125	0.121201	22.9135	36.0039	0.2957	0.0554894	0	0.313223	0.0876149	0	3.88134	0.0868848	2.34954	0	0	0.386236	0.165008	2.49483	0.00949161	5.64605	0.0109519	0	0
	H	7.7816	18.5548	2.90815	6.52785	6.78631	0.975702	4.45891	30.4964	5.70255	0	0.338715	0	4.06648	0.00568738	4.42478	0	0	0.152295	1.59942	0	0	0.0745679	0	0.424658	0	4.67187	0.0492907
